# Supplementary material for: Microfluidic device enabled quantitative time-lapse microscopic-photography for phenotyping vegetative and reproductive phases in Fusarium virguliforme, which is pathogenic to soybean
Source: PubMed Central journal article supplement (PMC5353701; doi:10.1038/srep44365), 2017-03-15
Supplement: srep44365-s1.pdf [file srep44365-s1.pdf]

## Supplementary Information

Microfluidic device enabled quantitative time-lapse microscopic-photography for phenotyping vegetative and reproductive phases in *Fusarium virguliforme*, which is pathogenic to soybean

Jill Marshall<sup>1\*</sup>, Xuan Qiao<sup>2\*</sup>, Jordan Baumbach<sup>1\*</sup>, Jingyu Xie<sup>2</sup>, Liang Dong<sup>2†</sup>, and Madan K. Bhattacharyya<sup>1†</sup>

<sup>1</sup>G303 Agronomy Hall, Iowa State University, Ames, IA 50011-1010, USA

<sup>2</sup>2115 Coover Hall, Iowa State University, Ames, IA 50011-1010, USA

\*These authors contributed equally to this work.

†Correspondence and requests for materials should be addressed to M.K.B. [mbhattac@iastate.edu](mailto:mbhattac@iastate.edu) or L.D. [ldong@iastate.edu](mailto:ldong@iastate.edu)

## Supplementary Figures

**Fig. S1:** Time-lapse microscopic-photography of germination of a *F. virguliforme* conidium.

[http://www.memslab.net/uploads/1/1/5/5/11554938/supplementary\\_figure\\_1.wmv](http://www.memslab.net/uploads/1/1/5/5/11554938/supplementary_figure_1.wmv)

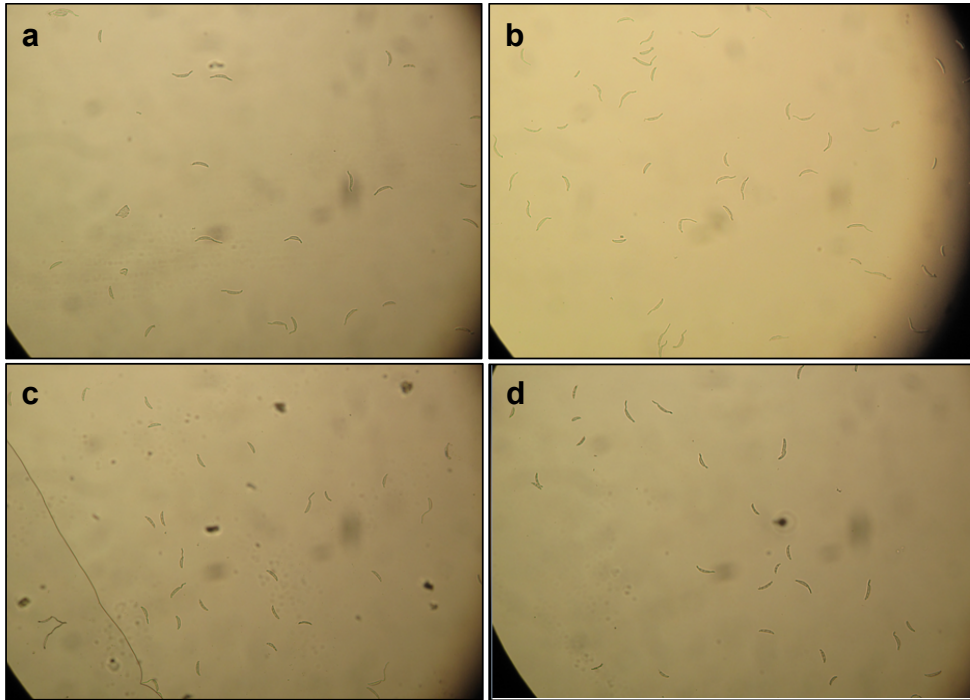

**Fig. S2:** Germinating spores on microscope slide five hours after being exposed to: (a) 1/3 PDB medium (b) PA medium with spermidine (c) Water (d) PA medium with spermine

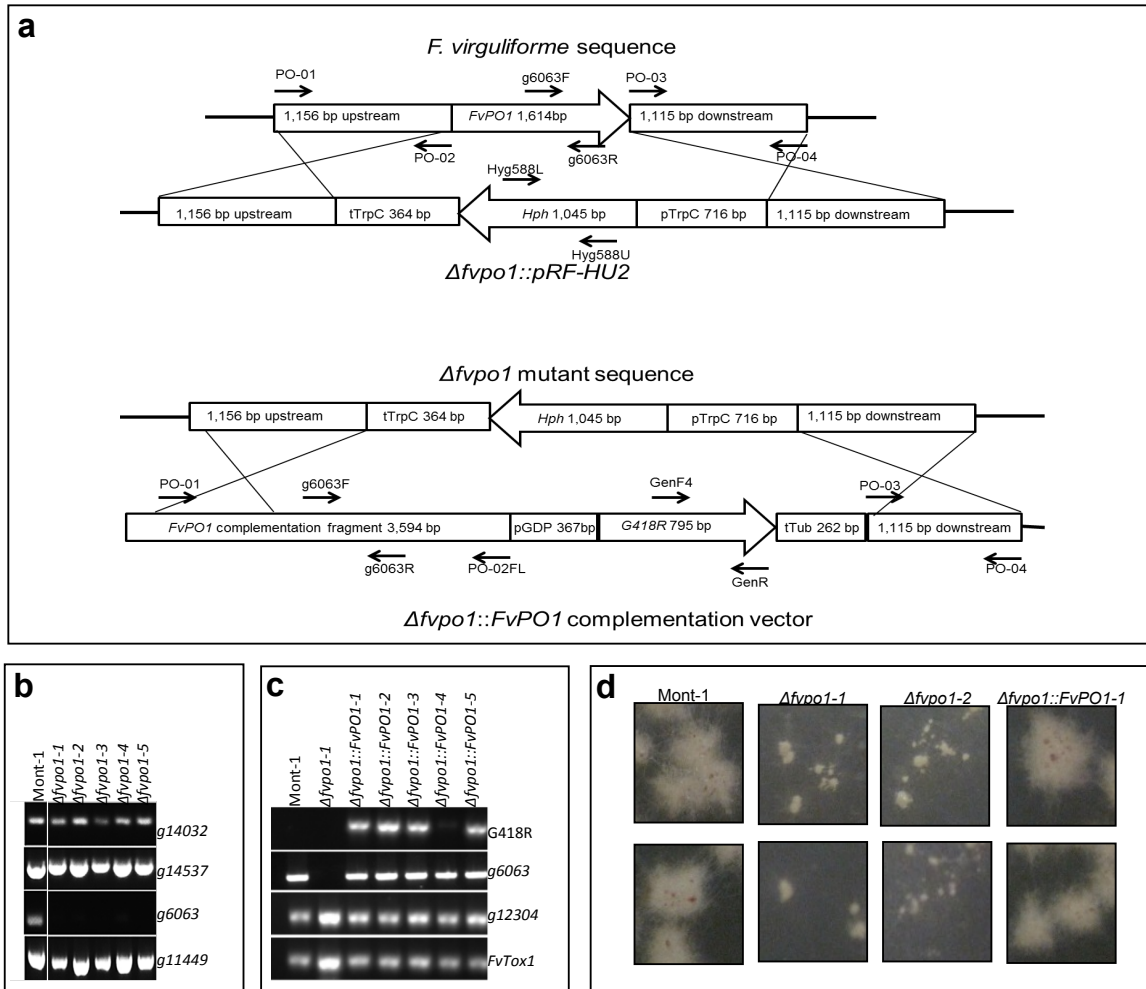

**Fig. S3:** Construction of  $\Delta fvp01$  knockout and complemented mutants. **(a)** Schematic representation of the strategy for creating both  $\Delta fvp01$  and complemented  $\Delta fvp01::FvPO1$  isolates. Transformations were created using homologous recombination vector pRF-HU2. **(b)** PCR confirming knockout  $fvp01$  mutants. Primer location for  $g6063$  can be found in A.  $g14032$ ,  $g14537$ , and  $g11449$  are control genes to show presence of fungal DNA in all samples. **(c)** PCR showing the complementation of the  $\Delta fvp01-1$  mutant. Location of primers for  $g6063$ ,  $G418R$  (GenF4 and GenR) can be found in A.  $g12304$  and  $FvTox1$  were used as controls to show presence of fungal DNA in all samples. All primer sequences can be found in Supplemental Table 4. **(d)** Lack of growth of  $fvp01$  in a PA medium. Growth of conidial spores of  $\Delta fvp01-1$ ,  $\Delta fvp01-2$ ,  $\Delta fvp01-1::FvPO1$ , and Mont-1 on PA medium containing spermine as the sole nitrogen source. Reduced growth of  $\Delta fvp01-1$  and  $\Delta fvp01-2$  in a PA medium confirmed the decreased polyamine oxidase activity in these mutants due to loss of the  $FvPO1$  gene among these knockout mutants. Complemented  $\Delta fvp01::FvPO1$  isolate regained the polyamine oxidase activity and able to grow in a PA medium as the wild-type Mont-1 isolate.

**Fig. S4:** Time-lapse microscopic-photography of sporulation in *F. virguliforme*  
[http://www.memslab.net/uploads/1/1/5/5/11554938/supplemental\\_figure\\_2.wmv](http://www.memslab.net/uploads/1/1/5/5/11554938/supplemental_figure_2.wmv)

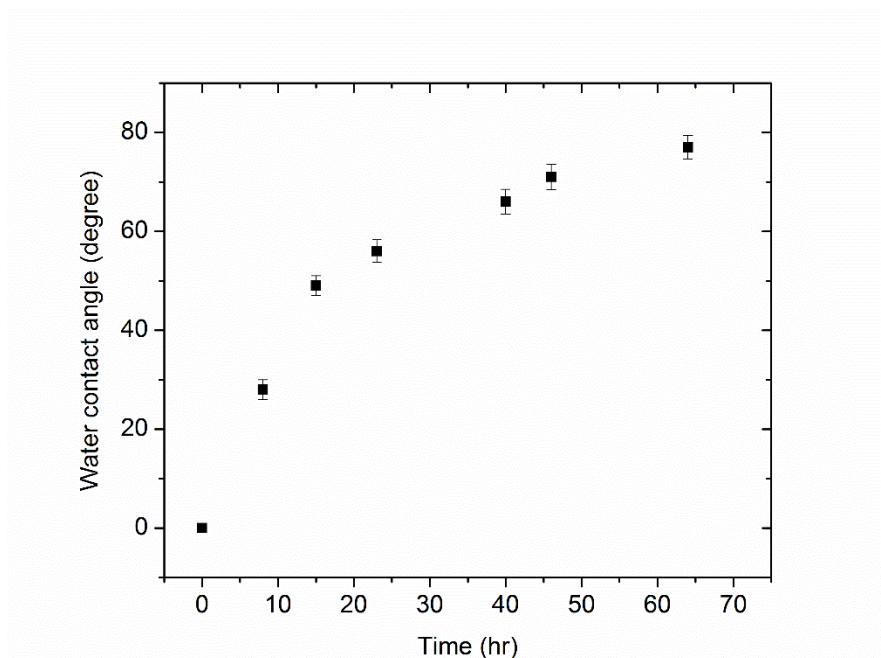

**Fig. S5:** Water contact angle of PDMS surface as a function of time. The spherical droplets used for the water contact angle measurements were appropriately 1-mm-diameter across. The weighing ratio of base to curing agent of PDMS precursor solution was 10:1. The curing temperature was 80 °C. The curing time was 1 h.

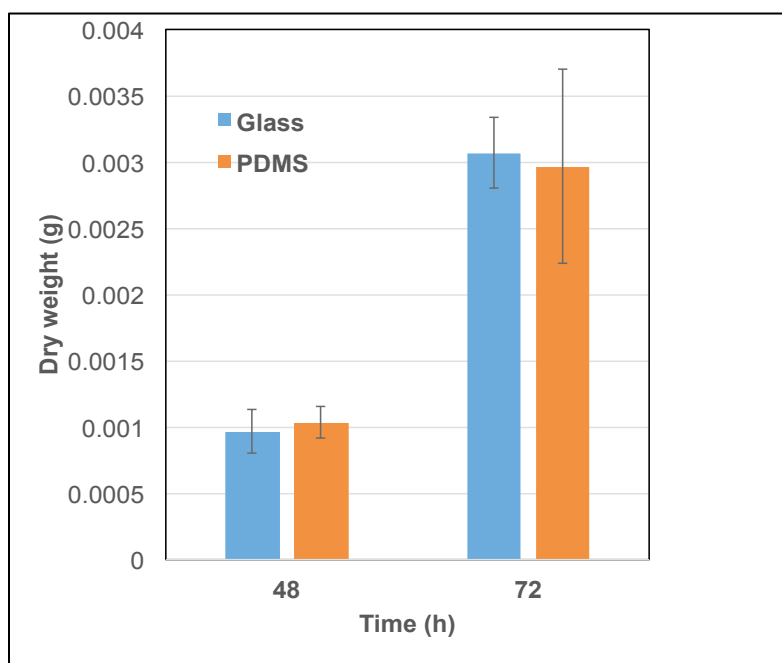

**Fig. S6.** The graph shows the growth of the fungus on glass plates and glass plates with PDMS. The weight is based on fungal dry weight. Based on a students t-test no significant difference between fungal weights on glass plates and plates with PDMS after 48 hours or 72 hours ( $p= 0.37$  and  $0.26$ , respectively) was observed.

## Supplementary Tables

**Supplementary Table 1.** Time taken to observe the first visible sign of germination.

| Observation number      | Location on channel | Germination tube visible (h) |
|-------------------------|---------------------|------------------------------|
| PA medium with spermine |                     |                              |
| 1                       | 163                 | 5.75                         |
| 2                       | 164                 | 4.25                         |
| 3                       | 165                 | 5.25                         |
| 4                       | 166                 | 5.5                          |
| 5                       | 167                 | 5                            |
| 6                       | 168                 | 4.75                         |
| 7                       | 169                 | 4.25                         |
| 8                       | 170                 | 6                            |
| 9                       | 171                 | 4                            |
| 10                      | 172                 | 4.75                         |
| 11                      | 173                 | 4.75                         |
| 12                      | 174                 | 5.25                         |
| 13                      | 175                 | 6                            |
| 14                      | 176                 | 5                            |
| 15                      | 177                 | 4.25                         |
| 16                      | 178                 | 4.5                          |
| 17                      | 179                 | 5.5                          |
| 18                      | 180                 | 6                            |
| 19                      | 181                 | 4                            |
| 20                      | 182                 | 6.75                         |
| 21                      | 183                 | 4.25                         |
| 22                      | 184                 | 4.5                          |
| 23                      | 185                 | 4.5                          |
| 24                      | 186                 | 4.75                         |
| 25                      | 187                 | 4                            |
| 26                      | 188                 | 6.5                          |
| 27                      | 189                 | 3.75                         |
| 28                      | 190                 | 5.5                          |
| 29                      | 191                 | 5.25                         |
| 30                      | 192                 | 6.25                         |
| 31                      | 162                 | 3.75                         |

|                           |     |      |
|---------------------------|-----|------|
| 32                        | 163 | 5.75 |
| 33                        | 164 | 7    |
| 34                        | 165 | 5.75 |
| 35                        | 166 | 6.25 |
| 36                        | 167 | 5    |
| 37                        | 168 | 5    |
| 38                        | 169 | 5.25 |
| 39                        | 170 | 7    |
| 40                        | 171 | 4.25 |
| 41                        | 172 | 5    |
| 42                        | 173 | 6.75 |
| 43                        | 174 | 5.25 |
| 44                        | 175 | 4.5  |
| 45                        | 176 | 5.25 |
| 46                        | 177 | 6    |
| 47                        | 178 | 5.75 |
| 48                        | 180 | 5    |
| 49                        | 181 | 5.75 |
| 50                        | 182 | 7.5  |
| 51                        | 183 | 5.25 |
| 52                        | 185 | 6.25 |
| 53                        | 186 | 6.25 |
| 54                        | 187 | 5.5  |
| 55                        | 188 | 5.75 |
| 56                        | 189 | 6    |
| 57                        | 190 | 5    |
| 58                        | 191 | 5.25 |
| 59                        | 192 | 4.5  |
| PA medium with spermidine |     |      |
| 1                         | 193 | 4.5  |
| 2                         | 194 | 5.5  |
| 3                         | 195 | 5.75 |
| 4                         | 196 | 4.5  |
| 5                         | 197 | 5.25 |
| 6                         | 198 | 5.25 |
| 7                         | 199 | 5.25 |
| 8                         | 200 | 4.75 |
| 9                         | 201 | 6    |

|    |     |      |
|----|-----|------|
| 10 | 202 | 4.5  |
| 11 | 203 | 6.25 |
| 12 | 204 | 4.5  |
| 13 | 205 | 4.5  |
| 14 | 206 | 5.75 |
| 15 | 207 | 6    |
| 16 | 208 | 5    |
| 17 | 209 | 5.5  |
| 18 | 210 | 4.75 |
| 19 | 211 | 4.5  |
| 20 | 212 | 4.25 |
| 21 | 213 | 4.75 |
| 22 | 214 | 5.5  |
| 23 | 215 | 4.75 |
| 24 | 216 | 5.5  |
| 25 | 217 | 6.25 |
| 26 | 218 | 6.25 |
| 27 | 220 | 5.75 |
| 28 | 221 | 5.5  |
| 29 | 193 | 5.75 |
| 30 | 194 | 5.25 |
| 31 | 195 | 4.25 |
| 32 | 196 | 5.25 |
| 33 | 197 | 5    |
| 34 | 198 | 8.5  |
| 35 | 199 | 5.75 |
| 36 | 200 | 5.5  |
| 37 | 201 | 4.25 |
| 38 | 202 | 4.75 |
| 39 | 203 | 5.25 |
| 40 | 204 | 5.25 |
| 41 | 205 | 5    |
| 42 | 206 | 5    |
| 43 | 207 | 5    |
| 44 | 208 | 3.75 |
| 45 | 209 | 4    |
| 46 | 210 | 4.75 |
| 47 | 211 | 5    |
| 48 | 212 | 3.75 |



|               |     |      |
|---------------|-----|------|
| 49            | 213 | 7    |
| 50            | 214 | 4.25 |
| 51            | 215 | 5    |
| 52            | 216 | 4.75 |
| 53            | 217 | 4    |
| 54            | 218 | 4.25 |
| 55            | 219 | 4.5  |
| 56            | 220 | 7    |
| 57            | 221 | 4    |
| 58            | 222 | 4.25 |
| 1/3 PDB media |     |      |
| 1             | 162 | 4.67 |
| 2             | 163 | 4.42 |
| 3             | 164 | 4.67 |
| 4             | 165 | 5.92 |
| 5             | 166 | 5.42 |
| 6             | 167 | 3.67 |
| 7             | 168 | 5.92 |
| 8             | 169 | 4.17 |
| 9             | 170 | 4.92 |
| 10            | 171 | 5.17 |
| 11            | 172 | 5.42 |
| 12            | 173 | 6.17 |
| 13            | 174 | 5.17 |
| 14            | 175 | 4.42 |
| 15            | 176 | 4.42 |
| 16            | 177 | 4.17 |
| 17            | 178 | 4.92 |
| 18            | 179 | 5.17 |
| 19            | 180 | 4.17 |
| 20            | 181 | 5.17 |
| 21            | 182 | 5.42 |
| 22            | 183 | 4.17 |
| 23            | 184 | 4.67 |
| 24            | 185 | 4.67 |
| 25            | 186 | 4.92 |
| 26            | 187 | 4.92 |
| 27            | 188 | 5.67 |

|       |     |      |
|-------|-----|------|
| 28    | 189 | 5.17 |
| 29    | 190 | 4.17 |
| 30    | 191 | 4.17 |
| 31    | 162 | 3.42 |
| 32    | 163 | 3.92 |
| 33    | 165 | 6.92 |
| 34    | 167 | 9.17 |
| 35    | 168 | 5.92 |
| 36    | 169 | 5.67 |
| 37    | 170 | 3.42 |
| 38    | 171 | 4.17 |
| 39    | 172 | 9.42 |
| 40    | 173 | 3.42 |
| 41    | 174 | 3.92 |
| 42    | 176 | 4.17 |
| 43    | 177 | 3.92 |
| 44    | 178 | 4.67 |
| 45    | 180 | 6.17 |
| 46    | 185 | 3.67 |
| 47    | 186 | 5.67 |
| 48    | 188 | 3.42 |
| 49    | 189 | 5.17 |
| 50    | 190 | 3.92 |
| 51    | 192 | 4.17 |
| Water |     |      |
| 1     | 192 | 7.17 |
| 2     | 193 | 4.67 |
| 3     | 194 | 5.92 |
| 4     | 195 | 5.42 |
| 5     | 196 | 4.92 |
| 6     | 197 | 5.92 |
| 7     | 198 | 6.17 |
| 8     | 199 | 5.67 |
| 9     | 200 | 5.17 |
| 10    | 201 | 5.42 |
| 11    | 202 | 5.92 |
| 12    | 203 | 4.67 |
| 13    | 204 | 6.67 |

|    |     |      |
|----|-----|------|
| 14 | 205 | 4.92 |
| 15 | 206 | 5.67 |
| 16 | 207 | 4.92 |
| 17 | 208 | 5.42 |
| 18 | 209 | 5.17 |
| 19 | 210 | 6.17 |
| 20 | 211 | 4.92 |
| 21 | 212 | 5.92 |
| 22 | 213 | 5.67 |
| 23 | 214 | 5.42 |
| 24 | 215 | 6.42 |
| 25 | 216 | 6.17 |
| 26 | 217 | 5.92 |
| 27 | 218 | 6.17 |
| 28 | 219 | 5.42 |
| 29 | 220 | 4.42 |
| 30 | 193 | 3.67 |
| 31 | 194 | 3.42 |
| 32 | 195 | 3.92 |
| 33 | 196 | 3.67 |
| 34 | 198 | 4.67 |
| 35 | 199 | 3.42 |
| 36 | 200 | 3.92 |
| 37 | 202 | 4.42 |
| 38 | 203 | 3.42 |
| 39 | 204 | 8.67 |
| 40 | 205 | 8.17 |
| 41 | 206 | 3.67 |
| 42 | 207 | 4.67 |
| 43 | 208 | 3.17 |
| 44 | 210 | 5.92 |
| 45 | 211 | 3.67 |
| 46 | 214 | 4.17 |
| 47 | 215 | 4.17 |
| 48 | 216 | 3.92 |
| 49 | 217 | 3.42 |
| 50 | 221 | 3.92 |

**Supplementary Table 2.** Percent of spores germinated after five hours in media on glass slide.

| <b>Media</b> | <b>Percent germinated</b> |
|--------------|---------------------------|
| Spermidine   | 30                        |
| Spermine     | 28                        |
| 1/3 PDB      | 30                        |
| Water        | 51                        |
| Average      | 35                        |

**Supplementary Table 3.** Time taken for the first conidiospore to detach from an individual conidiophore following suspension of spores in liquid PA media.

| <b>Observation number</b>           | <b>Location on channel</b> | <b>First conidium detaches from conidiophore (h)</b> |
|-------------------------------------|----------------------------|------------------------------------------------------|
| PA medium with spermine (12/4/2015) |                            |                                                      |
| 1                                   | 180                        | 87                                                   |
| 2                                   | 190                        | 88.5                                                 |
| 3                                   | 191                        | 85.5                                                 |
| 4                                   | 192                        | 78                                                   |
| 5                                   | 193                        | 67.5                                                 |
| 6                                   | 194                        | 66                                                   |
| 7                                   | 195                        | 70.5                                                 |
| 8                                   | 196                        | 66                                                   |
| 9                                   | 197                        | 76.125                                               |
| 10                                  | 201                        | 87                                                   |
| 11                                  | 202                        | 90                                                   |
| 12                                  | 204                        | 85.5                                                 |
| 13                                  | 210                        | 81                                                   |
| 14                                  | 211                        | 85.5                                                 |
| 15                                  | 212                        | 63                                                   |
| 16                                  | 213                        | 64.5                                                 |
| 17                                  | 214                        | 67.5                                                 |

|                                        |     |      |
|----------------------------------------|-----|------|
| 18                                     | 215 | 78   |
| PA medium with spermine (12/30/2015)   |     |      |
| 19                                     | 165 | 61.5 |
| 20                                     | 166 | 54   |
| 21                                     | 167 | 60   |
| 22                                     | 168 | 57   |
| 23                                     | 169 | 64.5 |
| 24                                     | 171 | 55.5 |
| 25                                     | 173 | 61.5 |
| 26                                     | 174 | 57   |
| 27                                     | 176 | 58.5 |
| 28                                     | 177 | 64.5 |
| 29                                     | 178 | 49.5 |
| 30                                     | 179 | 48   |
| 31                                     | 180 | 49.5 |
| 32                                     | 181 | 64.5 |
| 33                                     | 182 | 63   |
| 34                                     | 183 | 54   |
| 35                                     | 184 | 49.5 |
| 36                                     | 185 | 52.5 |
| 37                                     | 187 | 39   |
| 38                                     | 188 | 58.5 |
| 39                                     | 189 | 48   |
| 40                                     | 190 | 52.5 |
| 41                                     | 191 | 46.5 |
| PA medium with spermidine (10/30/2015) |     |      |
| 1                                      | 194 | 72   |
| 2                                      | 196 | 76.5 |
| 3                                      | 198 | 78   |
| 4                                      | 199 | 64.5 |
| 5                                      | 201 | 76.5 |
| 6                                      | 202 | 76.5 |
| 7                                      | 203 | 85.5 |
| 8                                      | 205 | 82.5 |
| 9                                      | 206 | 63   |
| 11                                     | 208 | 66   |
| 12                                     | 209 | 72   |

|                                       |     |      |
|---------------------------------------|-----|------|
| 13                                    | 210 | 64.5 |
| 14                                    | 211 | 78   |
| 15                                    | 213 | 64.5 |
| 16                                    | 214 | 61.5 |
| 17                                    | 215 | 75   |
| PA medium with spermidine (12/4/2015) |     |      |
| 18                                    | 162 | 52.5 |
| 19                                    | 163 | 64.5 |
| 20                                    | 164 | 54   |
| 21                                    | 165 | 67.5 |
| 22                                    | 167 | 63   |
| 23                                    | 168 | 75   |
| 24                                    | 169 | 75   |
| 25                                    | 175 | 75   |
| 26                                    | 179 | 65.8 |
| PA medium with spermidine 12/30/2015  |     |      |
| 27                                    | 192 | 61.5 |
| 28                                    | 196 | 69   |
| 29                                    | 197 | 60   |
| 30                                    | 198 | 60   |
| 31                                    | 202 | 75   |
| 32                                    | 203 | 79.5 |

**Supplementary Table 4.** Time taken for an individual conidium to mature and detach from the conidiophore. Note that data in blue font or red font in a microscopic filed indicate the conidium developed from single conidiophores in succession.

| Observation Number    | Location on channel | Start of spore formation (h) | Spore detaches from conidiophore (h) | Total no. hours to produce a spore |
|-----------------------|---------------------|------------------------------|--------------------------------------|------------------------------------|
| Spermidine 10/30/2015 |                     |                              |                                      |                                    |
| 1                     | 164                 |                              |                                      | 0                                  |
| 2                     | 171                 | 79.5                         | 91.5                                 | 12                                 |
| 3                     |                     | 91.5                         | 105                                  | 13.5                               |
| 4                     | 172                 |                              |                                      | 0                                  |
| 5                     | 175                 |                              |                                      | 0                                  |
| 6                     | 177                 | 79.5                         | 88.5                                 | 9                                  |
| 7                     |                     | 99                           | 114                                  | 15                                 |
| 8                     |                     | 103.5                        | 120                                  | 16.5                               |
| 9                     | 183                 | 84                           | 94.5                                 | 10.5                               |
| 10                    |                     | 94.5                         | 106.5                                | 12                                 |
| 11                    | 194                 | 72                           | 82.5                                 | 10.5                               |
| 12                    |                     | 82.5                         | 97.5                                 | 15                                 |
| 13                    |                     | 87                           | 100.5                                | 13.5                               |
| 14                    |                     | 96                           | 103.5                                | 7.5                                |
| 15                    |                     | 102                          | 115.5                                | 13.5                               |
| 16                    | 195                 |                              |                                      | 0                                  |
| 17                    | 196                 | 75                           | 88.5                                 | 13.5                               |
| 18                    |                     | 79.5                         | 91.5                                 | 12                                 |
| 19                    |                     | 90                           | 105                                  | 15                                 |
| 20                    |                     | 94.5                         | 111                                  | 16.5                               |
| 21                    |                     | 97.5                         | 111                                  | 13.5                               |
| 22                    | 197                 |                              |                                      | 0                                  |
| 23                    | 198                 | 79.5                         | 90                                   | 10.5                               |
| 24                    |                     | 90                           | 103.5                                | 13.5                               |
| 25                    |                     | 90                           | 99                                   | 9                                  |
| 26                    |                     | 91.5                         | 102                                  | 10.5                               |
| 27                    |                     | 91.5                         | 103.5                                | 12                                 |
| 28                    | 199                 | 63                           | 72                                   | 9                                  |
| 29                    |                     | 73.5                         | 85.5                                 | 12                                 |
| 30                    |                     | 81                           | 99                                   | 18                                 |

|    |     |       |       |      |
|----|-----|-------|-------|------|
| 31 |     | 103.5 | 120   | 16.5 |
| 32 | 200 |       |       | 0    |
| 33 | 201 | 76.5  | 87    | 10.5 |
| 34 |     | 88.5  | 102   | 13.5 |
| 35 |     | 97.5  | 114   | 16.5 |
| 36 |     | 102   | 115.5 | 13.5 |
| 37 | 202 | 76.5  | 84    | 7.5  |
| 38 |     | 81    | 88.5  | 7.5  |
| 39 |     | 84    | 94.5  | 10.5 |
| 40 |     | 85.5  | 93    | 7.5  |
| 41 |     | 87    | 93    | 6    |
| 42 |     | 91.5  | 103.5 | 12   |
| 43 |     | 94.5  | 103.5 | 9    |
| 44 | 203 | 85.5  | 99    | 13.5 |
| 45 |     | 97.5  | 106.5 | 9    |
| 46 | 204 |       |       | 0    |
| 47 | 205 | 85.5  | 96    | 10.5 |
| 48 |     | 97.5  | 109.5 | 12   |
| 49 | 206 | 70.5  | 78    | 7.5  |
| 50 |     | 72    | 82.5  | 10.5 |
| 51 |     | 73.5  | 85.5  | 12   |
| 52 |     | 90    | 102   | 12   |
| 53 |     | 108   | 118.5 | 10.5 |
| 54 | 207 | 64.5  | 73.5  | 9    |
| 55 |     | 66    | 76.5  | 10.5 |
| 56 |     | 70.5  | 81    | 10.5 |
| 57 |     | 78    | 87    | 9    |
| 58 |     | 79.5  | 90    | 10.5 |
| 59 |     | 87    | 96    | 9    |
| 60 | 208 | 75    | 87    | 12   |
| 61 |     | 75    | 87    | 12   |
| 62 |     | 88.5  | 99    | 10.5 |
| 63 |     | 90    | 112.5 | 22.5 |
| 64 | 209 | 70.5  | 81    | 10.5 |
| 65 |     | 85.5  | 99    | 13.5 |
| 66 |     | 96    | 114   | 18   |
| 67 | 210 | 63    | 73.5  | 10.5 |
| 68 |     | 63    | 73.5  | 10.5 |
| 69 |     | 67.5  | 81    | 13.5 |



|                      |     |       |       |      |
|----------------------|-----|-------|-------|------|
| 70                   |     | 67.5  | 81    | 13.5 |
| 71                   |     | 73.5  | 84    | 10.5 |
| 72                   | 211 | 78    | 90    | 12   |
| 73                   |     | 82.5  | 93    | 10.5 |
| 74                   |     | 99    | 112.5 | 13.5 |
| 75                   | 212 |       |       | 0    |
| 76                   |     | 64.5  | 73.5  | 9    |
| 77                   | 213 | 72    | 81    | 9    |
| 78                   |     | 73.5  | 84    | 10.5 |
| 79                   |     | 82.5  | 96    | 13.5 |
| 80                   |     | 60    | 69    | 9    |
| 81                   | 214 | 69    | 84    | 15   |
| 82                   |     | 103.5 | 121.5 | 18   |
| 83                   |     | 66    | 78    | 12   |
| 84                   | 215 | 73.5  | 88.5  | 15   |
| 85                   |     | 81    | 94.5  | 13.5 |
| 86                   |     | 94.5  | 111   | 16.5 |
| Spermidine 12/4/2015 |     |       |       |      |
| 86                   |     | 51    | 61.5  | 10.5 |
| 87                   | 162 | 61.5  | 75    | 13.5 |
| 88                   |     | 61.5  | 75    | 13.5 |
| 89                   |     | 78    | 88.5  | 10.5 |
| 90                   |     | 66    | 73.5  | 7.5  |
| 91                   | 163 | 81    | 93    | 12   |
| 92                   |     | 84    | 94.5  | 10.5 |
| 93                   |     | 87    | 102   | 15   |
| 94                   |     | 52.5  | 61.5  | 9    |
| 95                   | 164 | 75.5  | 88.5  | 13   |
| 96                   |     | 87    | 97.5  | 10.5 |
| 97                   |     | 70.5  | 82.5  | 12   |
| 98                   | 165 | 70.5  | 81    | 10.5 |
| 99                   |     | 78    | 87    | 9    |
| 100                  |     | 84    | 96    | 12   |
| 101                  |     | 82.5  | 93    | 10.5 |
| 102                  | 166 | 93    | 108   | 15   |
| 103                  |     | 66    | 81    | 15   |
| 104                  | 167 | 70.5  | 79.5  | 9    |
| 105                  |     | 82.5  | 94.5  | 12   |
| 106                  |     | 88.5  | 103.5 | 15   |

|                     |     |      |      |      |
|---------------------|-----|------|------|------|
| 107                 | 168 | 90   | 102  | 12   |
| 108                 | 168 | 76.5 | 88.5 | 12   |
| 109                 | 169 |      |      | 0    |
| 110                 | 170 | 79.5 | 91.5 | 12   |
| 111                 | 171 |      |      | 0    |
| 112                 | 172 |      |      | 0    |
| 113                 | 173 |      |      | 0    |
| 114                 | 174 |      |      | 0    |
| 115                 | 175 | 76.5 | 88.5 | 12   |
| 116                 |     | 88.5 | 105  | 16.5 |
| 117                 | 176 |      |      | 0    |
| 118                 | 177 |      |      | 0    |
| 119                 | 178 |      |      | 0    |
| 120                 | 179 |      |      | 0    |
| Spermidine 12/30/15 |     |      |      |      |
| 121                 | 192 | 60   | 73.5 | 13.5 |
| 122                 |     | 63   | 75   | 12   |
| 123                 |     | 61.5 | 75   | 13.5 |
| 124                 |     | 66   | 79.5 | 13.5 |
| 125                 |     | 67.5 | 84   | 16.5 |
| 126                 | 196 | 64.5 | 75   | 10.5 |
| 127                 |     | 66   | 75   | 9    |
| 128                 |     | 69   | 76.5 | 7.5  |
| 129                 |     | 69   | 82.5 | 13.5 |
| 130                 | 197 | 79.5 | 96   | 13.5 |
| 131                 |     | 60   | 72   | 12   |
| 132                 |     | 75   | 94.5 | 19.5 |
| 133                 |     | 76.5 | 94.5 | 18   |
| 134                 | 198 | 60   | 70.5 | 10.5 |
| 135                 |     | 73.5 | 88.5 | 15   |
| 136                 |     | 73.5 | 87   | 13.5 |
| 137                 |     | 78   | 96   | 18   |
| 138                 | 202 | 75   | 90   | 15   |
| 139                 |     | 81   | 94.5 | 13.5 |
| 140                 | 203 | 79.5 | 90   | 10.5 |
| Spermine 10/30/2015 |     |      |      |      |
| 1                   | 180 | 87   | 99   | 12   |
| 2                   |     | 90   | 99   | 9    |
| 3                   | 181 | 85.5 | 96   | 10.5 |

|    |     |      |       |      |
|----|-----|------|-------|------|
| 4  | 182 |      |       | 0    |
| 5  | 183 | 81   | 96    | 15   |
| 6  |     | 90   | 102   | 12   |
| 7  | 184 | 85.5 | 99    | 13.5 |
| 8  |     | 96   | 106.5 | 10.5 |
| 9  | 185 | 78   | 87    | 9    |
| 10 |     | 81   | 90    | 9    |
| 11 |     | 85.5 | 96    | 10.5 |
| 12 | 186 | 93   | 103.5 | 10.5 |
| 13 | 195 | 91.5 | 102   | 10.5 |
| 14 | 196 | 90   | 106.5 | 16.5 |
| 15 |     | 99   | 106.5 | 7.5  |
| 16 | 199 | 87   | 96    | 9    |
| 17 |     | 88.5 | 102   | 13.5 |
| 18 |     | 96   | 108   | 12   |
| 19 | 201 | 85.5 | 97.5  | 12   |
| 20 |     | 85.5 | 97.5  | 12   |
| 21 |     | 90   | 100.5 | 10.5 |
| 22 | 202 | 88.5 | 99    | 10.5 |
| 23 | 203 |      |       | 0    |
| 24 | 204 | 70.5 | 82.5  | 12   |
| 25 |     | 73.5 | 85.5  | 12   |
| 26 |     | 76.5 | 84    | 7.5  |
| 27 |     | 87   | 102   | 15   |
| 28 | 207 | 79.5 | 91.5  | 12   |
| 29 |     | 82.5 | 94.5  | 12   |
| 30 |     | 90   | 103.5 | 13.5 |
| 31 | 208 | 60   | 69    | 9    |
| 32 |     | 66   | 78    | 12   |
| 33 |     | 66   | 78    | 12   |
| 34 |     | 69   | 78    | 9    |
| 35 |     | 81   | 102   | 21   |
| 36 | 209 | 66   | 76.5  | 10.5 |
| 37 |     | 66   | 78    | 12   |
| 38 |     | 75   | 87    | 12   |
| 39 |     | 84   | 103.5 | 19.5 |
| 40 | 210 | 67.5 | 82.5  | 15   |
| 41 | 211 |      |       | 0    |
| 42 | 212 | 66   | 78    | 12   |

|                     |     |      |       |      |
|---------------------|-----|------|-------|------|
| 43                  | 213 | 70.5 | 84    | 13.5 |
| 44                  |     | 84   | 103.5 | 19.5 |
| 45                  |     | 85.5 | 97.5  | 12   |
| 46                  | 214 | 72   | 87    | 15   |
| 47                  |     | 82.5 | 96    | 13.5 |
| 48                  | 215 | 78   | 90    | 12   |
| 49                  |     | 93   | 106.5 | 13.5 |
| 50                  |     | 97   | 99    | 2    |
| Spermine 12/30/2015 |     |      |       |      |
| 51                  | 165 | 61.5 | 79.5  | 18   |
| 52                  |     | 61.5 | 73.5  | 12   |
| 53                  |     | 64.5 | 81    | 16.5 |
| 54                  |     | 81   | 93    | 12   |
| 55                  |     | 82.5 | 102   | 19.5 |
| 56                  | 166 | 54   | 60    | 6    |
| 57                  |     | 54   | 69    | 15   |
| 58                  |     | 55.5 | 75    | 19.5 |
| 59                  |     | 73.5 | 88.5  | 15   |
| 60                  |     | 93   | 118.5 | 25.5 |
| 61                  | 167 | 60   | 69    | 9    |
| 62                  |     | 63   | 69    | 6    |
| 63                  |     | 64.5 | 75    | 10.5 |
| 64                  |     | 67.5 | 82.5  | 15   |
| 65                  |     | 67.5 | 84    | 16.5 |
| 66                  | 168 | 57   | 69    | 12   |
| 67                  |     | 61.5 | 73.5  | 12   |
| 68                  |     | 69   | 79.5  | 10.5 |
| 69                  |     | 69   | 79.5  | 10.5 |
| 70                  |     | 73.5 | 90    | 16.5 |
| 71                  | 169 | 64.5 | 75    | 10.5 |
| 72                  |     | 76.5 | 85.5  | 9    |
| 73                  |     | 82.5 | 87    | 4.5  |
| 74                  |     | 94.5 | 106.5 | 12   |
| 75                  | 171 | 55.5 | 66    | 10.5 |
| 76                  |     | 55.5 | 79.5  | 24   |
| 77                  |     | 70.5 | 82.5  | 12   |
| 78                  |     | 70.5 | 79.5  | 9    |
| 79                  |     | 82.5 | 99    | 16.5 |
| 80                  | 173 | 57   | 67.5  | 10.5 |

|     |     |      |       |      |
|-----|-----|------|-------|------|
| 81  |     | 61.5 | 75    | 13.5 |
| 82  |     | 66   | 82.5  | 16.5 |
| 83  |     | 67.5 | 81    | 13.5 |
| 84  |     | 76.5 | 96    | 19.5 |
| 85  | 174 | 57   | 66    | 9    |
| 86  |     | 61.5 | 76.5  | 15   |
| 87  |     | 66   | 78    | 12   |
| 88  |     | 78   | 90    | 12   |
| 89  |     | 94.5 | 114   | 19.5 |
| 90  | 176 | 58.5 | 73.5  | 15   |
| 91  |     | 58.5 | 73.5  | 15   |
| 92  |     | 67.5 | 78    | 10.5 |
| 93  |     | 72   | 81    | 9    |
| 94  |     | 76.5 | 93    | 16.5 |
| 95  | 177 | 64.5 | 76.5  | 12   |
| 96  |     | 66   | 78    | 12   |
| 97  |     | 69   | 81    | 12   |
| 98  |     | 76.5 | 105   | 28.5 |
| 99  |     | 78   | 91.5  | 13.5 |
| 100 | 178 | 45   | 61.5  | 16.5 |
| 101 |     | 49.5 | 63    | 13.5 |
| 102 |     | 55.5 | 72    | 16.5 |
| 103 |     | 63   | 70.5  | 7.5  |
| 104 |     | 76.5 | 90    | 13.5 |
| 105 | 179 | 48   | 66    | 18   |
| 106 |     | 49.5 | 58.5  | 9    |
| 107 |     | 57   | 70.5  | 13.5 |
| 108 |     | 67.5 | 75    | 7.5  |
| 109 |     | 91.5 | 100.5 | 9    |
| 110 | 180 | 63   | 73.5  | 10.5 |
| 111 |     | 73.5 | 88.5  | 15   |
| 112 |     | 75   | 87    | 12   |
| 113 |     | 75   | 91.5  | 16.5 |
| 114 |     | 84   | 102   | 18   |
| 115 | 181 | 64.5 | 75    | 10.5 |
| 116 |     | 66   | 76.5  | 10.5 |
| 117 |     | 78   | 93    | 15   |
| 118 |     | 97.5 | 111   | 13.5 |
| 119 |     | 108  | 115.5 | 7.5  |

|     |     |      |       |      |
|-----|-----|------|-------|------|
| 120 | 182 | 63   | 85.5  | 22.5 |
| 121 |     | 66   | 82.5  | 16.5 |
| 122 |     | 90   | 106.5 | 16.5 |
| 123 | 187 | 39   | 52.5  | 13.5 |
| 124 |     | 45   | 58.5  | 13.5 |
| 125 |     | 52.5 | 63    | 10.5 |
| 126 |     | 57   | 67.5  | 10.5 |
| 127 |     | 66   | 78    | 12   |
| 128 | 188 | 57   | 67.5  | 10.5 |
| 129 |     | 61.5 | 73.5  | 12   |
| 130 |     | 63   | 73.5  | 10.5 |
| 131 |     | 73.5 | 90    | 16.5 |
| 132 |     | 73.5 | 87    | 13.5 |
| 133 | 189 | 48   | 55.5  | 7.5  |
| 134 |     | 57   | 66    | 9    |
| 135 |     | 67.5 | 84    | 16.5 |
| 136 |     | 67.5 | 79.5  | 12   |
| 137 |     | 79.5 | 97.5  | 18   |
| 138 | 190 | 52.5 | 64.5  | 12   |
| 139 |     | 52.5 | 66    | 13.5 |
| 140 |     | 52.5 | 67.5  | 15   |
| 141 |     | 57   | 67.5  | 10.5 |
| 142 |     | 61.5 | 73.5  | 12   |
| 143 | 191 | 46.5 | 54    | 7.5  |
| 144 |     | 48   | 55.5  | 7.5  |
| 145 |     | 57   | 64.5  | 7.5  |
| 146 |     | 58.5 | 70.5  | 12   |
| 147 |     | 61.5 | 70.5  | 9    |

**Supplementary Table 5.** Primers used in generating *fyp1* and complemented *fyp1* mutant.

| <b>Primer Name</b> | <b>Sequence</b>                          |
|--------------------|------------------------------------------|
| PO-01              | ggtcttaaugctggatatgctacattgcaactc        |
| PO-02              | ggcattaauggacgaggtgtgagagctggttcatc      |
| PO-03              | ggacttaauggacctgcattgcgatgtatgattg       |
| PO-04              | gggtttaauctcgcggacgtggagacatgtaagtg      |
| PO-UU              | ggaggacagagtggagaaaggcattg               |
| PO-DD              | gaggatctggtcaagaaccagatc                 |
| g6063F             | ggtggctgtatggctcttacagcaac               |
| g6063R             | cgtcgttccatgaagaacctcatac                |
| PO-02FL            | ggcattaaucagcttgaggcagccaccttcgtacacgatg |
| Hyg588U            | agctgcgccgatggtttctacaa                  |
| Hyg588L            | gcgcgtctgctgtccatacaa                    |
| GenF4              | gctgaccgcttctcgtgctttac                  |
| GenR               | gaattcactagtaggaacttcggaataggaacttc      |
